# Supplementary material
Source: ML conference proceedings conference paper supplement (https://proceedings.mlr.press/v33/honorio14.html)
Supplement: Supplementary file [file honorio14-supp.pdf]

## A Proof of Expression in Equation (6)

In this section, we restate the results provided in [3, 16] in order to obtain eq.(6). We follow the well-known Lagrangian duality approach as in Appendix A in [14].

The following result is provided in [3, 16]. Let  $\Omega(\boldsymbol{\mu}, \boldsymbol{\Sigma})$  be the family of all distributions with mean  $\boldsymbol{\mu}$  and covariance  $\boldsymbol{\Sigma}$ . For a fixed weight vector  $\mathbf{a}$  and constant  $b$ , we have:

$$\sup_{\mathbf{z} \in \Omega(\boldsymbol{\mu}, \boldsymbol{\Sigma})} \mathbb{P}_{\mathbf{z} \sim \mathcal{Z}}[\mathbf{a}^\top \mathbf{z} \geq b] = \frac{1}{1 + d^2}$$

where  $d^2 = \inf_{\mathbf{a}^\top \mathbf{z} \geq b} (\mathbf{z} - \boldsymbol{\mu})^\top \boldsymbol{\Sigma}^{-1} (\mathbf{z} - \boldsymbol{\mu})$

Let  $\mathbf{a} = -\mathbf{w}$  and  $b = 0$ . We have:

$$\sup_{\mathbf{z} \in \Omega(\boldsymbol{\mu}, \boldsymbol{\Sigma})} \mathbb{P}_{\mathbf{z} \sim \mathcal{Z}}[\mathbf{w}^\top \mathbf{z} \leq 0] = \frac{1}{1 + d^2}$$

where  $d^2 = \inf_{\mathbf{w}^\top \mathbf{z} \leq 0} (\mathbf{z} - \boldsymbol{\mu})^\top \boldsymbol{\Sigma}^{-1} (\mathbf{z} - \boldsymbol{\mu})$

Note that if  $\mathbf{w}^\top \boldsymbol{\mu} \leq 0$ , then we can just take  $\mathbf{z} = \boldsymbol{\mu}$  and obtain  $d^2 = 0$ , which is certainly the optimum because  $d^2 \geq 0$  due to positive definiteness of  $\boldsymbol{\Sigma}$ . In what follows, we assume  $\mathbf{w}^\top \boldsymbol{\mu} > 0$ , as required in eq.(6).

We are interested in the value of  $d^2$ . That is, we seek for a closed-form solution of the *primal* problem:

$$\min_{\mathbf{w}^\top \mathbf{z} \leq 0} (\mathbf{z} - \boldsymbol{\mu})^\top \boldsymbol{\Sigma}^{-1} (\mathbf{z} - \boldsymbol{\mu}) \quad (36)$$

which has the following Lagrangian:

$$\mathcal{L}(\mathbf{z}, \lambda) = (\mathbf{z} - \boldsymbol{\mu})^\top \boldsymbol{\Sigma}^{-1} (\mathbf{z} - \boldsymbol{\mu}) + \lambda \mathbf{w}^\top \mathbf{z}$$

By optimality arguments (i.e.  $\partial \mathcal{L} / \partial \mathbf{z} = \mathbf{0}$ ), we have that  $\mathcal{L}$  is minimized at  $\mathbf{z}^* = -\frac{\lambda}{2} \boldsymbol{\Sigma} \mathbf{w} + \boldsymbol{\mu}$ . Therefore, the Lagrange dual function is given by:

$$\begin{aligned} g(\lambda) &= \inf_{\mathbf{z}} \mathcal{L}(\mathbf{z}, \lambda) \\ &= \mathcal{L}(\mathbf{z}^*, \lambda) \\ &= -\frac{\lambda^2}{4} \mathbf{w}^\top \boldsymbol{\Sigma} \mathbf{w} + \lambda \mathbf{w}^\top \boldsymbol{\mu} \end{aligned}$$

Consequently, the *dual* problem of eq.(36) is:

$$\max_{\lambda \geq 0} g(\lambda)$$

Again, by optimality arguments (i.e.  $\partial g / \partial \lambda = 0$ ), we have that  $g$  is maximized at  $\lambda^* = 2 \frac{\mathbf{w}^\top \boldsymbol{\mu}}{\mathbf{w}^\top \boldsymbol{\Sigma} \mathbf{w}}$ . Note that  $\lambda^* \geq 0$  since  $\mathbf{w}^\top \boldsymbol{\mu} > 0$ . Finally:

$$\begin{aligned} d^2 &= \max_{\lambda \geq 0} g(\lambda) \\ &= g(\lambda^*) \\ &= \frac{(\mathbf{w}^\top \boldsymbol{\mu})^2}{\mathbf{w}^\top \boldsymbol{\Sigma} \mathbf{w}} \\ &\equiv \mathcal{F}(\mathbf{w} | \boldsymbol{\mu}, \boldsymbol{\Sigma}) \end{aligned}$$

## B Moment Generating Function of the Square of a Sub-Gaussian Variable

Let  $s$  be a sub-Gaussian variable with parameter  $\sigma_s$  and mean  $\mu_s = \mathbb{E}[s]$ . By sub-Gaussianity, we know that the moment generating function is bounded as follows:

$$(\forall t \in \mathbb{R}) \mathbb{E}[e^{t(s-\mu_s)}] \leq e^{\frac{1}{2}t^2\sigma_s^2}$$

Our goal is to find a similar bound for the moment generating function of the sub-exponential variable  $v = s^2$ . Let  $\Gamma(r)$  be the Gamma function, the moments of the sub-Gaussian variable  $s$  are bounded as follows:

$$(\forall r \geq 0) \mathbb{E}[|s|^r] \leq r 2^{r/2} \sigma_s^r \Gamma(r/2)$$

Let  $\mu_v = \mathbb{E}[v]$ . By power series expansion and since  $\Gamma(r) = (r-1)!$  for an integer  $r$ , we have:

$$\begin{aligned} \mathbb{E}[e^{t(v-\mu_v)}] &= 1 + t\mathbb{E}[v - \mu_v] + \sum_{r=2}^{\infty} \frac{t^r \mathbb{E}[(v - \mu_v)^r]}{r!} \\ &\leq 1 + \sum_{r=2}^{\infty} \frac{t^r \mathbb{E}[|s|^{2r}]}{r!} \\ &\leq 1 + \sum_{r=2}^{\infty} \frac{t^r 2r 2^r \sigma_s^{2r} \Gamma(r)}{r!} \\ &= 1 + \sum_{r=2}^{\infty} t^r 2^{r+1} \sigma_s^{2r} \\ &= 1 + \frac{8t^2 \sigma_s^4}{1 - 2t\sigma_s^2} \end{aligned}$$

By making  $|t| \leq 1/(4\sigma_s^2)$ , we have  $1/(1 - 2t\sigma_s^2) \leq 2$ . Finally, since  $(\forall \alpha) 1 + \alpha \leq e^\alpha$ , we have that for a sub-Gaussian variable  $s$  with parameter  $\sigma_s$ :

$$(\forall |t| \leq 1/(4\sigma_s^2)) \mathbb{E}[e^{t(s^2 - \mathbb{E}[s^2])}] \leq e^{16t^2 \sigma_s^4} \quad (37)$$

Thus, we obtained a bound for the moment generating function of the sub-exponential variable  $s^2$ , that is similar to that of sub-Gaussian variables but holds only for a small range of  $t$ .
